# Supplementary material for: Healthcare professionals’ perspective can guide post-marketing surveillance of artemisinin-based combination therapy in Uganda
Source: PubMed Central journal article supplement (PMC7011371; doi:10.1186/s12936-020-3148-5), 2020-02-10

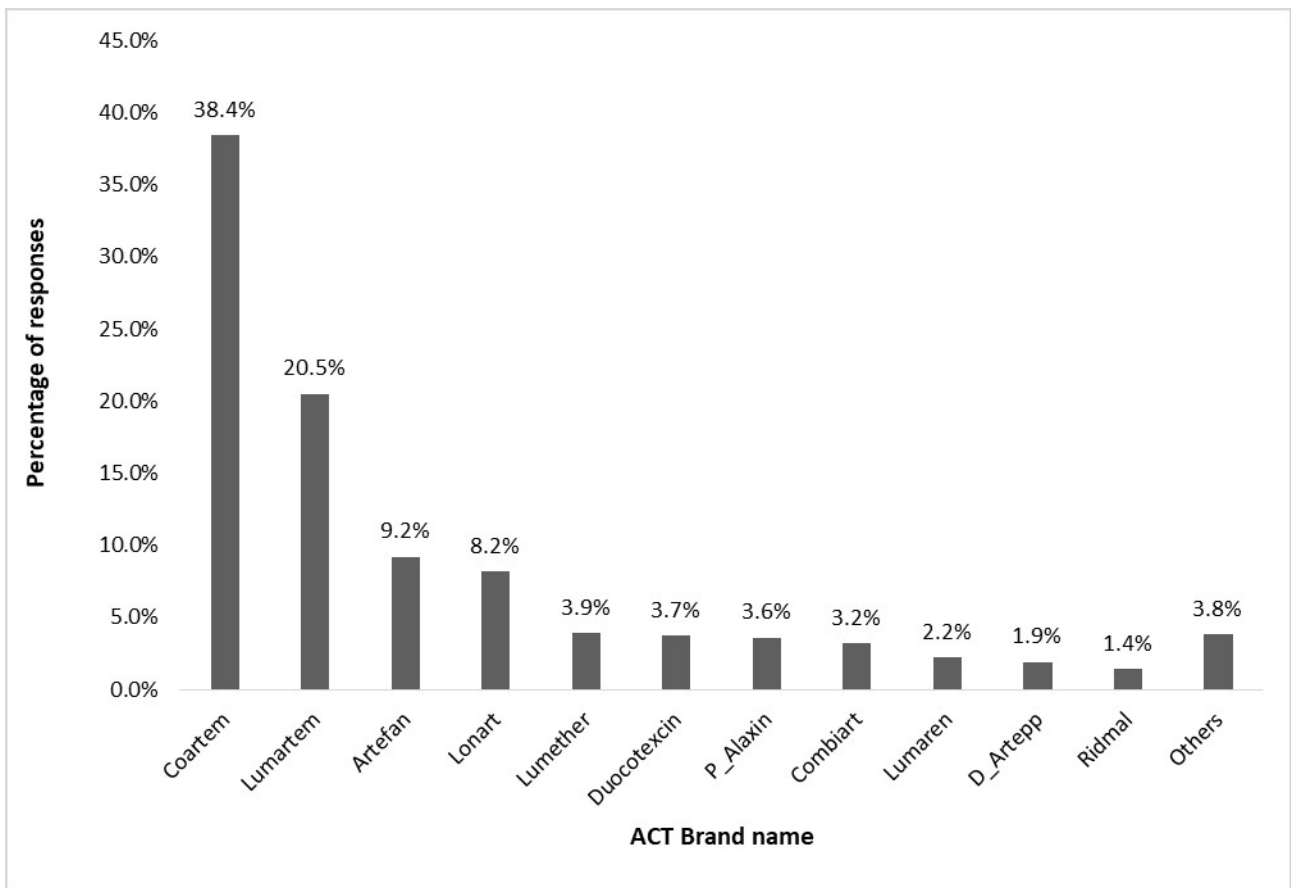

Supplement: 12936_2020_3148_MOESM2_ESM.pdf [file 12936_2020_3148_MOESM2_ESM.pdf]
